# Supplementary material
Source: PubMed Central journal article supplement (PMC3149750)
Supplement: NIHMS309968-supplement-1_si_001.pdf [file NIHMS309968-supplement-1_si_001.pdf]

### Supporting Information for

“Structural Insights into the Pre-amyloid Tetramer of  $\beta$ -2-microglobulin from Covalent Labeling and Mass Spectrometry”

Vanessa Leah Mendoza, Mario A. Barón-Rodríguez, Cristian Blanco, and Richard W. Vachet

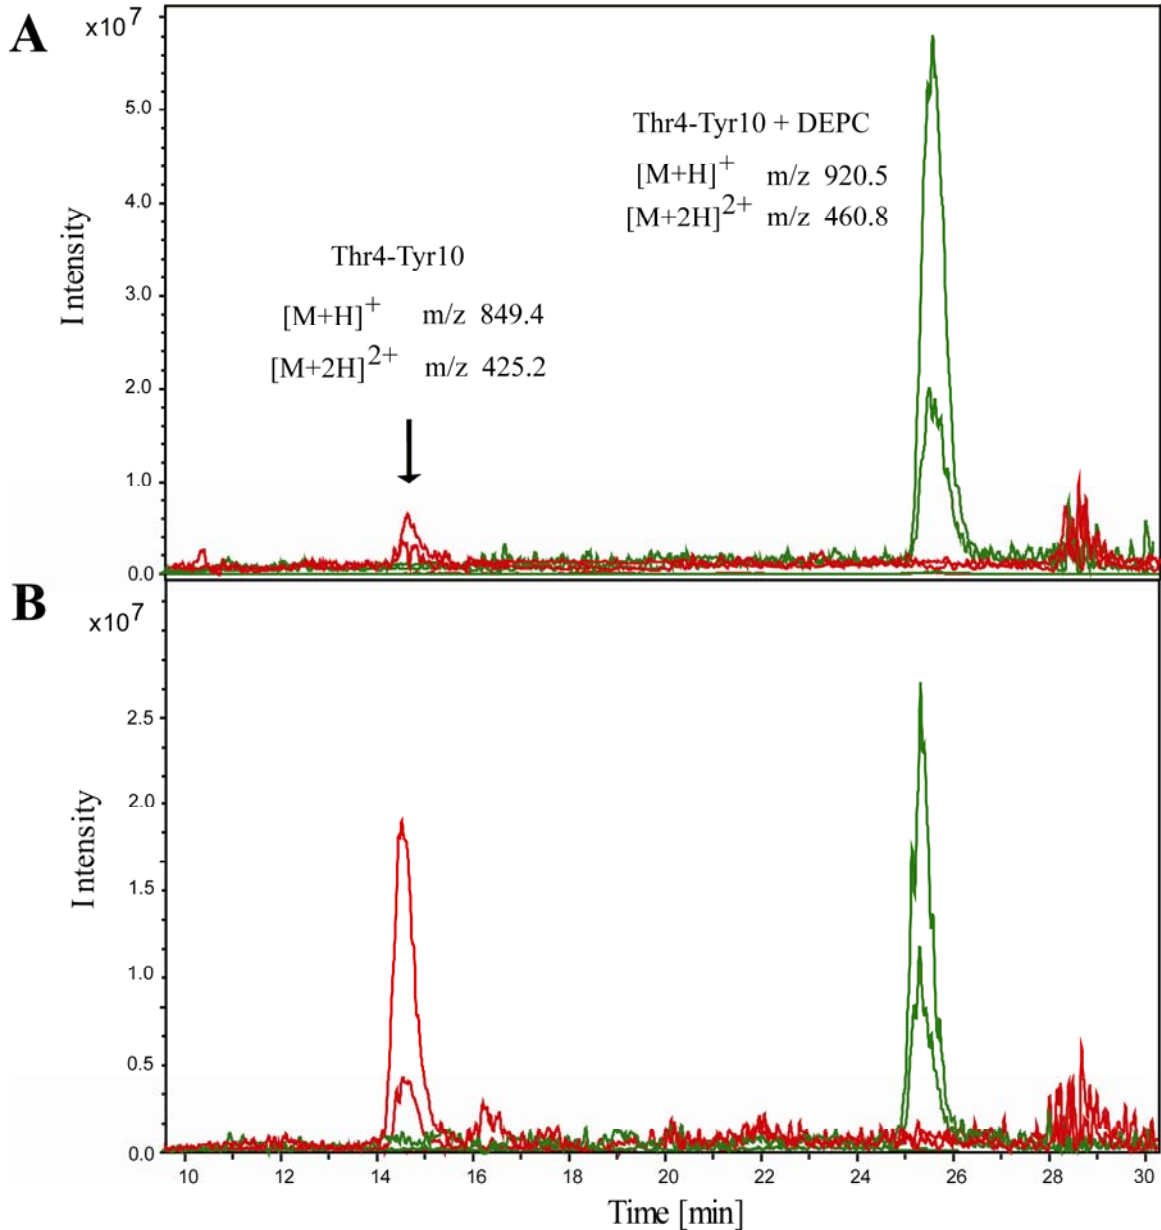

**Figure S1:** Extracted ion chromatograms (EIC) of the singly (m/z 849.4) and doubly charged (m/z 425.2) unmodified (red) and DEPC modified (green) forms of Thr from the proteolytic fragment Thr4-Tyr10 (m/z 920.5 and 460.8). (A) 2 hours and (B) 2 days after addition of Cu(II). The ion intensities of the unmodified and modified peptide ions were determined from these EIC plots. The peaks at ~14.5 min and ~25 min are the unmodified and Thr4-modified forms,

respectively. The changes in ion intensities 2 hours and 2 days after the addition of Cu(II) show the decrease in the DEPC modification percentage of Thr4 upon formation of the tetramer.

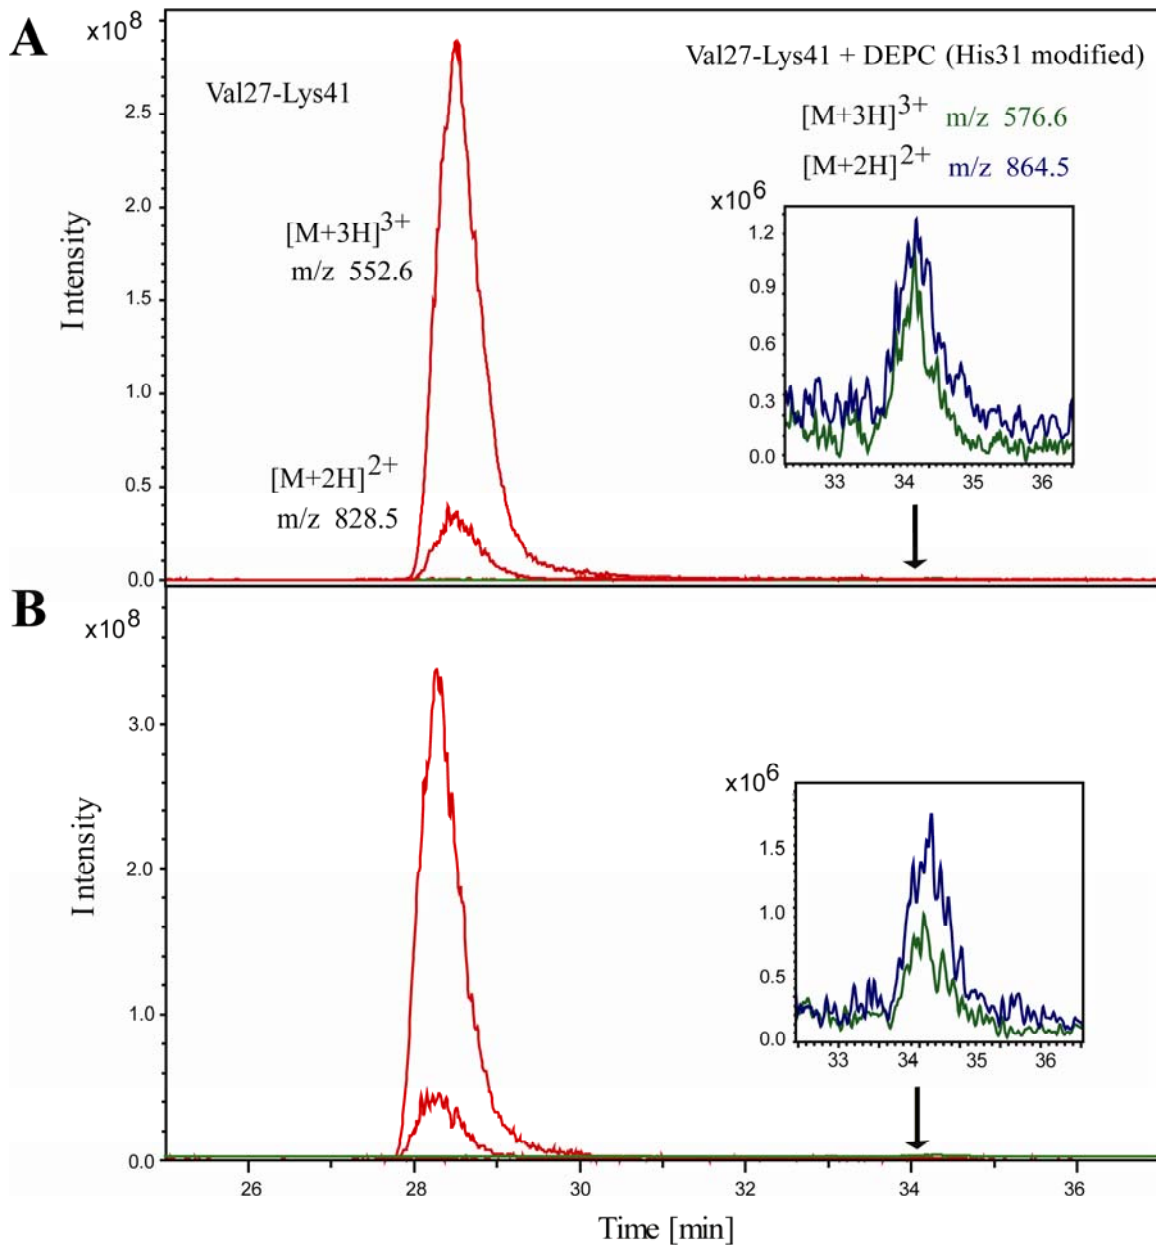

**Figure S2:** Extracted ion chromatograms (EIC) of the doubly (m/z 828.5) and triply charged (m/z 552.6) unmodified (red) and DEPC modified (blue and green) forms of His31 from the proteolytic fragment Val27-Lys41 (m/z 864.5 and 576.6) (A) 2 hours and (B) 2 days after addition of Cu(II). The ion intensities of the unmodified and modified peptide ions were determined from these EIC plots. The peaks at ~28 min and ~34 min are the unmodified and His31-modified forms, respectively. The ion intensities 2 hours and 2 days after the addition of Cu(II) show that there is little to no change in the percent DEPC modification of His31 upon formation of the tetramer.

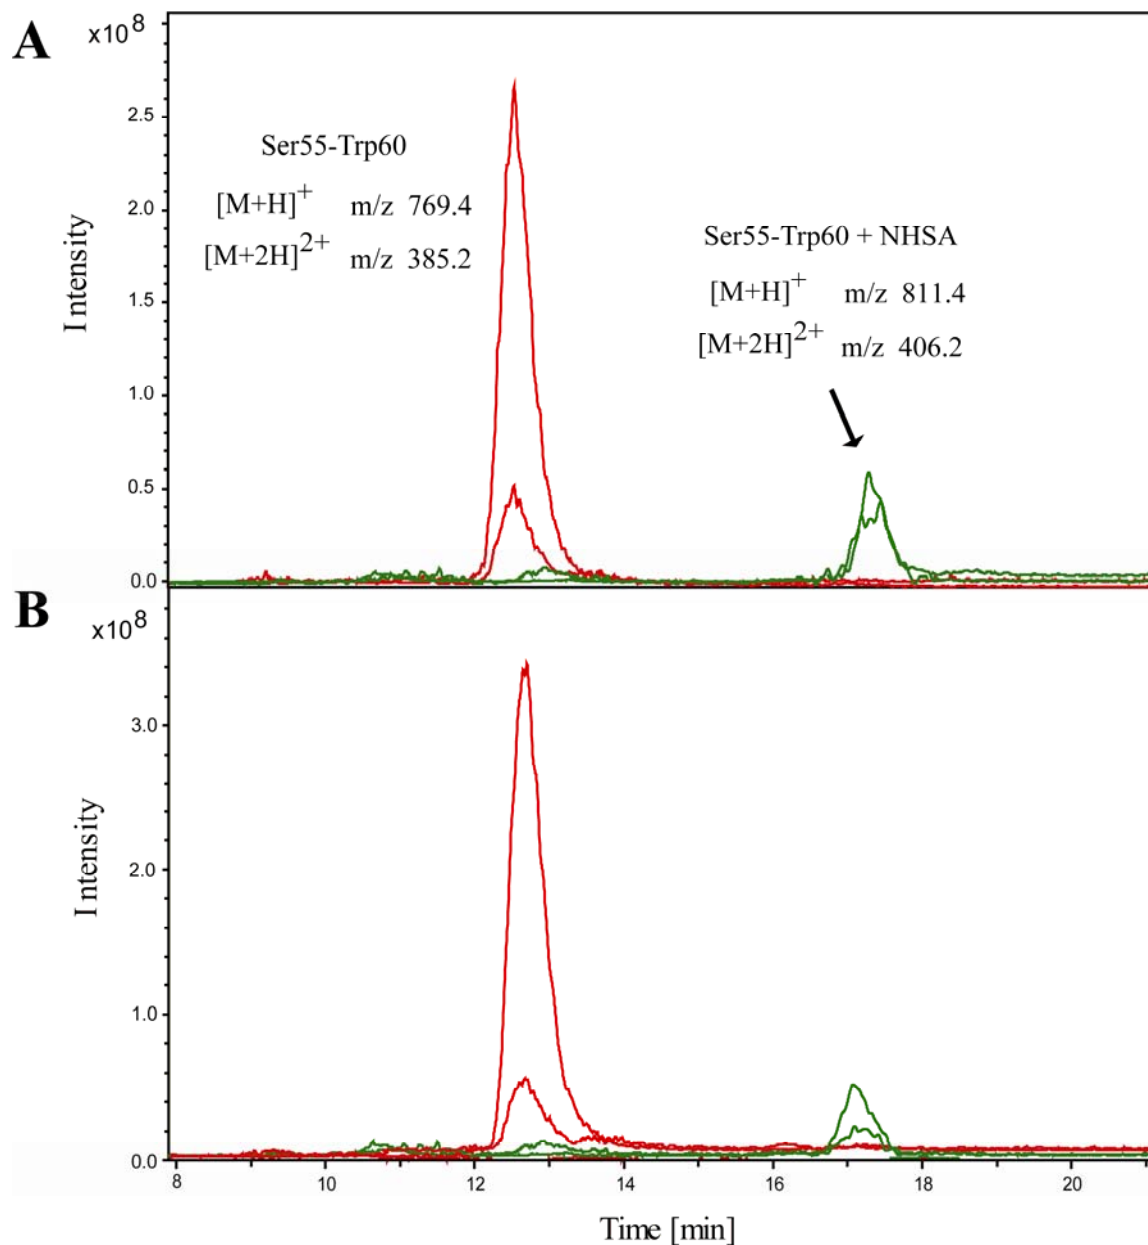

**Figure S3:** Extracted ion chromatograms (EIC) of the singly ( $m/z$  769.4) and doubly charged ( $m/z$  385.2) unmodified (red) and modified (green) forms of Lys58 from the proteolytic fragment Ser55-Trp60 ( $m/z$  811.4 and 406.2) (A) 2 hours and (B) 2 days after addition of Cu(II). The ion intensities of the unmodified and modified peptide ions were determined from these EIC plots. The peaks at  $\sim 12.5$  min and  $\sim 17$  min are the unmodified and Lys58-modified forms, respectively. The changes in ion intensities 2 hours and 2 days after the addition of Cu(II) show the decrease in the NHSA modification percentage of Lys58 upon formation of the tetramer.

**Table S1:** Extent of DEPC modification of a control  $\beta$ 2m solution (i.e. no Cu(II)) at time zero, 2 min, 2 hours, 1 day, and 2 days after beginning the incubation.

| Residue    | Incubation Time |                 |                 |                 |                 |
|------------|-----------------|-----------------|-----------------|-----------------|-----------------|
|            | 0 min           | 2 min           | 2 hrs           | 1 day           | 2 days          |
| N-terminus | 99 $\pm$ 5      | 97 $\pm$ 7      | 99 $\pm$ 4      | 98 $\pm$ 5      | 98 $\pm$ 6      |
| Thr4       | 86 $\pm$ 1      | 89 $\pm$ 5      | 86 $\pm$ 7      | 87 $\pm$ 2      | 87 $\pm$ 6      |
| Lys6       | 7.5 $\pm$ 0.5   | 7.2 $\pm$ 0.6   | 7.6 $\pm$ 0.5   | 7.1 $\pm$ 0.6   | 7.4 $\pm$ 0.4   |
| His13      | 45 $\pm$ 2      | 43 $\pm$ 4      | 40 $\pm$ 4      | 43 $\pm$ 3      | 42 $\pm$ 2      |
| Lys19      | 13 $\pm$ 2      | 11 $\pm$ 2      | 13 $\pm$ 1      | 12 $\pm$ 2      | 10 $\pm$ 1      |
| Tyr26      | 0.7 $\pm$ 0.1   | 0.76 $\pm$ 0.09 | 0.6 $\pm$ 0.1   | 0.8 $\pm$ 0.1   | 0.7 $\pm$ 0.1   |
| Ser28      | 0.24 $\pm$ 0.02 | 0.26 $\pm$ 0.03 | 0.25 $\pm$ 0.02 | 0.28 $\pm$ 0.02 | 0.27 $\pm$ 0.03 |
| His31      | 1.6 $\pm$ 0.3   | 1.5 $\pm$ 0.2   | 1.7 $\pm$ 0.2   | 1.8 $\pm$ 0.1   | 1.5 $\pm$ 0.2   |
| Ser33      | 1.7 $\pm$ 0.1   | 1.6 $\pm$ 0.1   | 1.9 $\pm$ 0.2   | 1.7 $\pm$ 0.3   | 1.5 $\pm$ 0.2   |
| Lys41      | 0.39 $\pm$ 0.03 | 0.34 $\pm$ 0.03 | 0.34 $\pm$ 0.03 | 0.37 $\pm$ 0.03 | 0.35 $\pm$ 0.04 |
| His51      | 61 $\pm$ 3      | 64 $\pm$ 3      | 62 $\pm$ 4      | 61 $\pm$ 5      | 59 $\pm$ 4      |
| Lys58      | 39 $\pm$ 3      | 41 $\pm$ 2      | 41 $\pm$ 3      | 37 $\pm$ 3      | 40 $\pm$ 2      |
| Tyr63      | 6.3 $\pm$ 0.5   | 6.0 $\pm$ 0.5   | 6.9 $\pm$ 0.7   | 6.5 $\pm$ 0.6   | 6.7 $\pm$ 0.4   |
| Tyr67      | 6.3 $\pm$ 0.3   | 6.0 $\pm$ 0.5   | 6.4 $\pm$ 0.5   | 5.9 $\pm$ 0.6   | 6.1 $\pm$ 0.5   |
| Lys75      | 0.31 $\pm$ 0.04 | 0.35 $\pm$ 0.06 | 0.37 $\pm$ 0.04 | 0.35 $\pm$ 0.04 | 0.37 $\pm$ 0.05 |
| Ser88      | 66 $\pm$ 3      | 62 $\pm$ 4      | 68 $\pm$ 5      | 64 $\pm$ 4      | 67 $\pm$ 6      |
| Lys94      | 28 $\pm$ 3      | 30 $\pm$ 2      | 26 $\pm$ 3      | 28 $\pm$ 2      | 27 $\pm$ 3      |

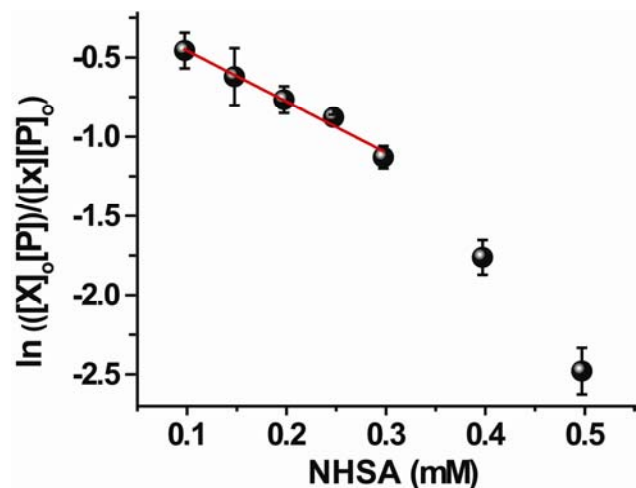

**Figure S4:** Dose-response plot for Lys41 after reaction with NHSA. The plot is produced from LC-MS data of the proteolytic digests of the modified protein. The  $[P]/[P]_0$  ratio is obtained by dividing the peak area for the unmodified fragment by the sum of the peak areas for the modified and unmodified fragments. The difference between the  $[P]$  and  $[P]_0$  values is used to determine the concentration of NHSA,  $[X]$ . Similar dose-response plots are generated for all modified peptides to confirm the maximum reagent concentration (or dose) that can be used without causing structural changes to the protein.

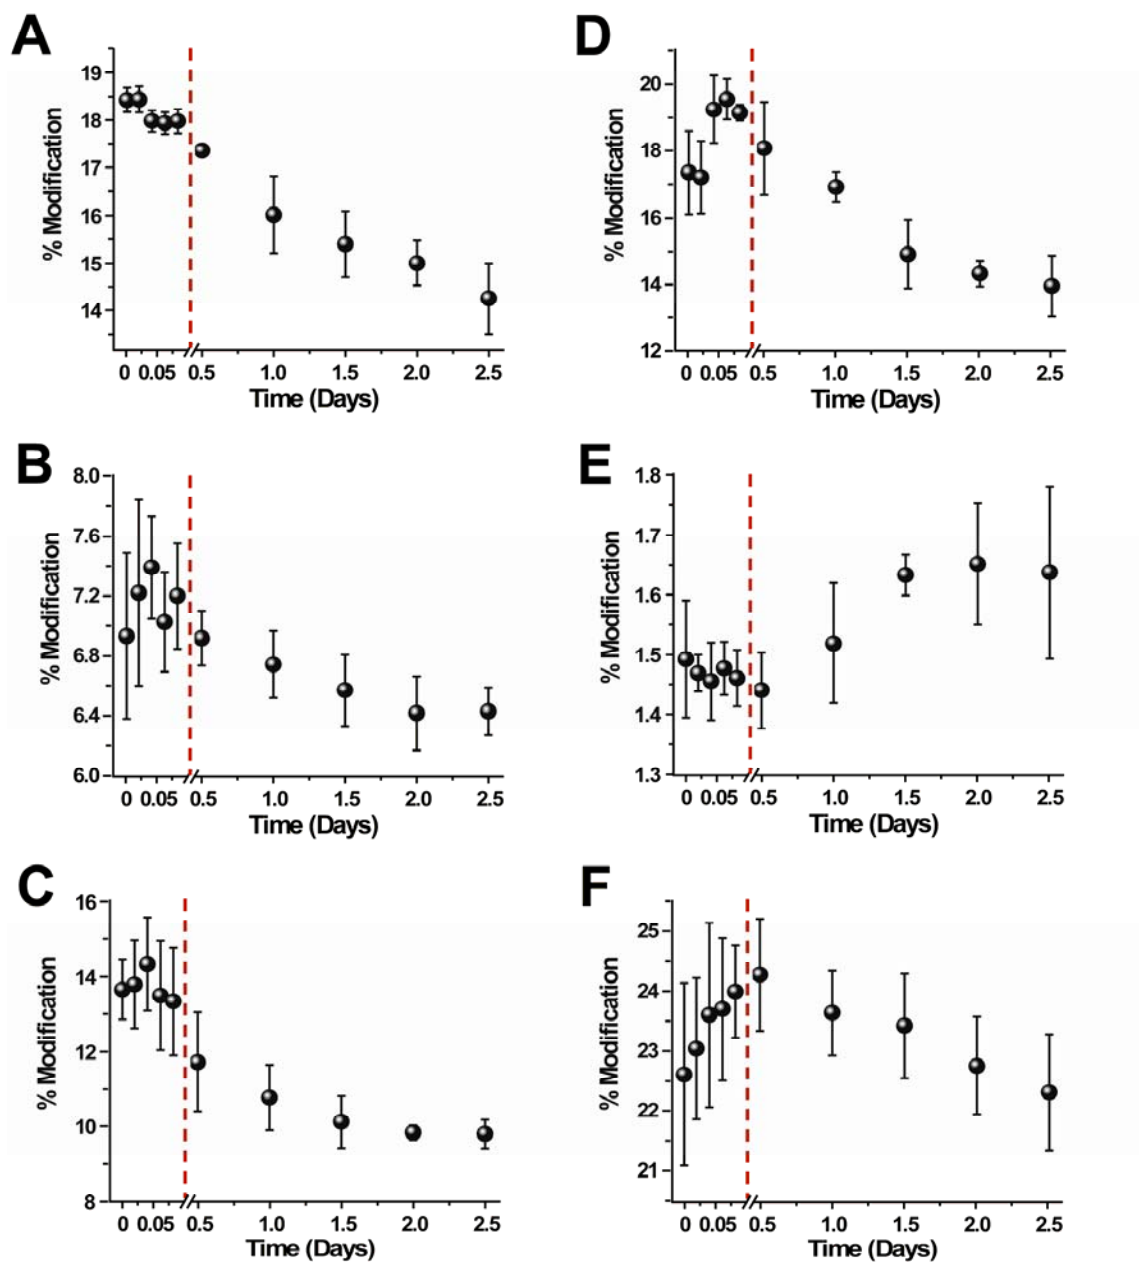

**Figure S5:** Extent of N-HSA modification throughout the course of the tetramer formation reaction. (A) Lys6. (B) Lys19. (C) Lys41. (D) Lys58. (E) Asn83. (F) Lys91.

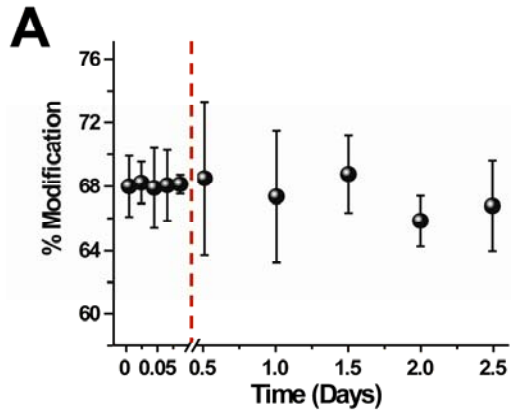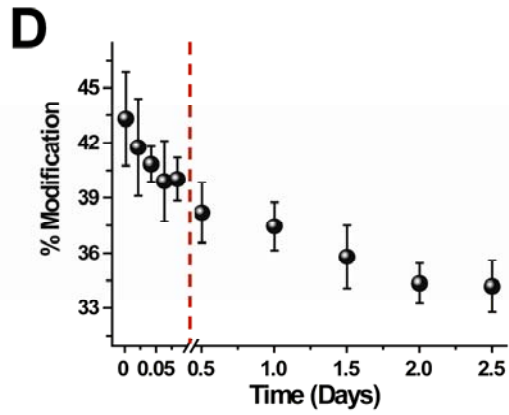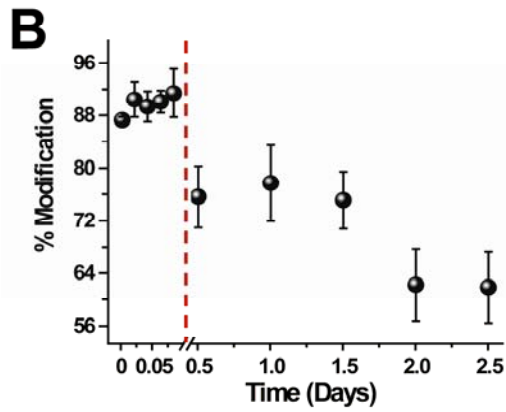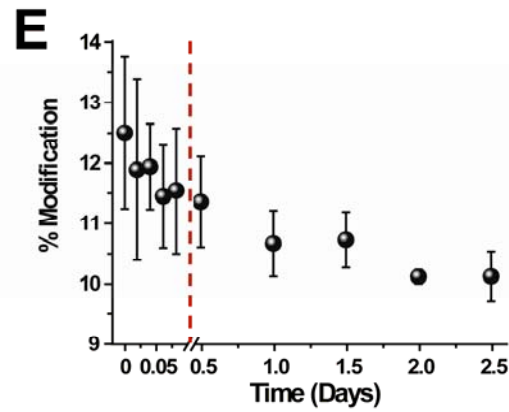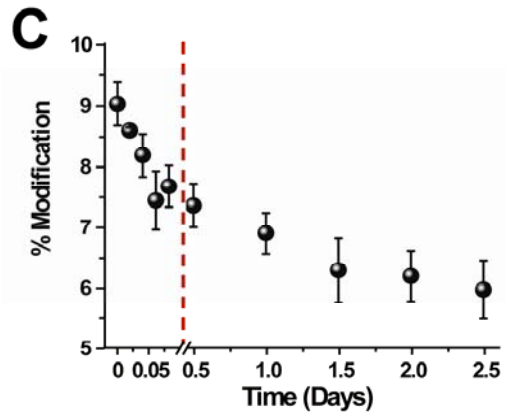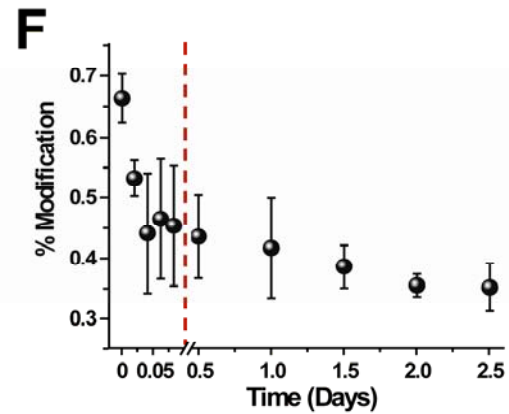

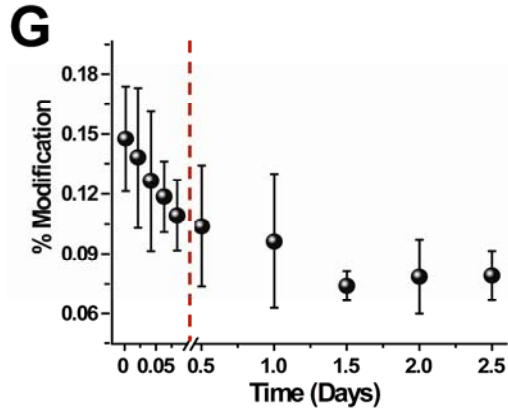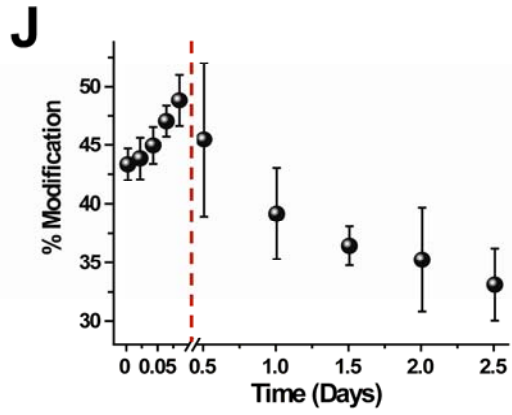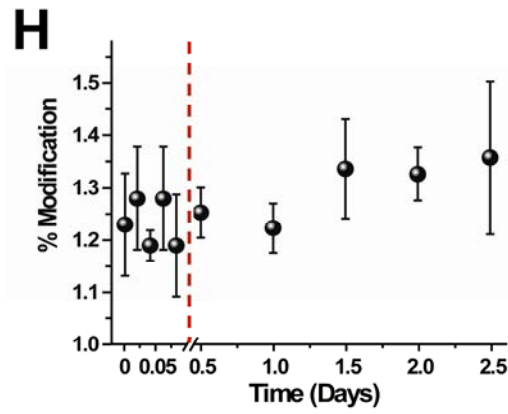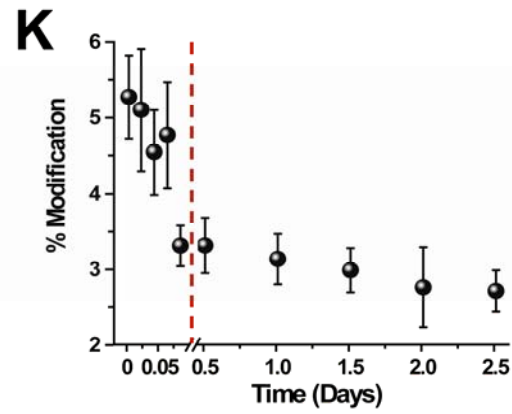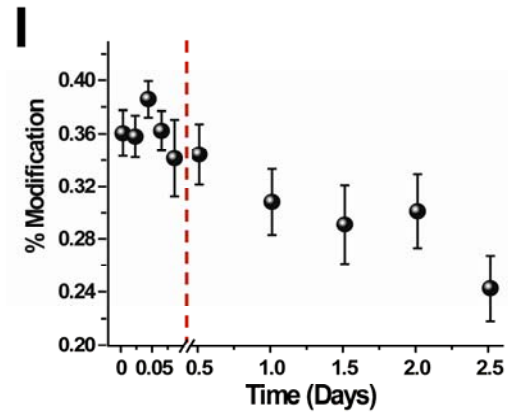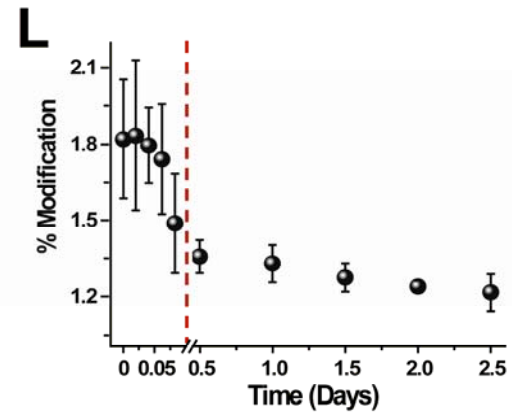



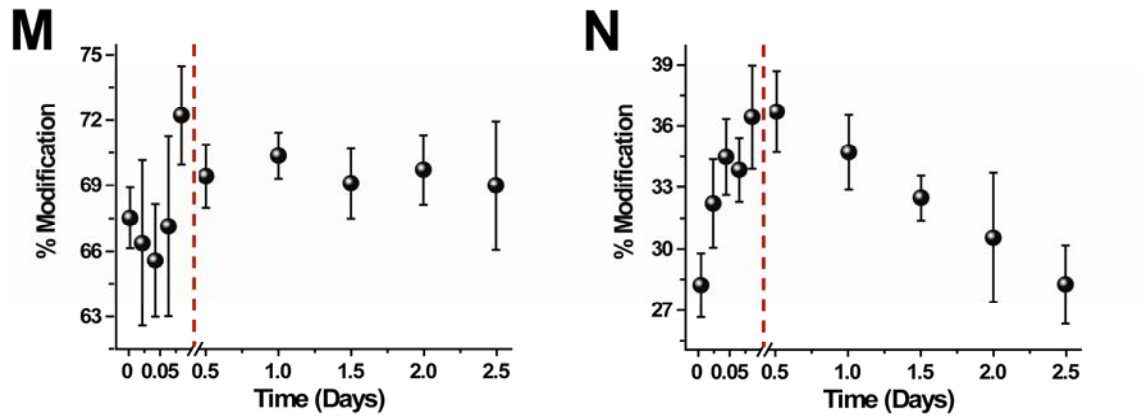

**Figure S6:** Extent of DEPC modification throughout the course of the tetramer formation reaction. (A) N-terminus. (B) Thr4. (C) Lys6. (D) His13. (E) Lys19. (F) Tyr26. (G) Ser28. (H) Ser33. (I) Lys41. (J) Serr57/Lys58. (K) Tyr63. (L) Tyr67. (M) Ser88. (N) Lys94.

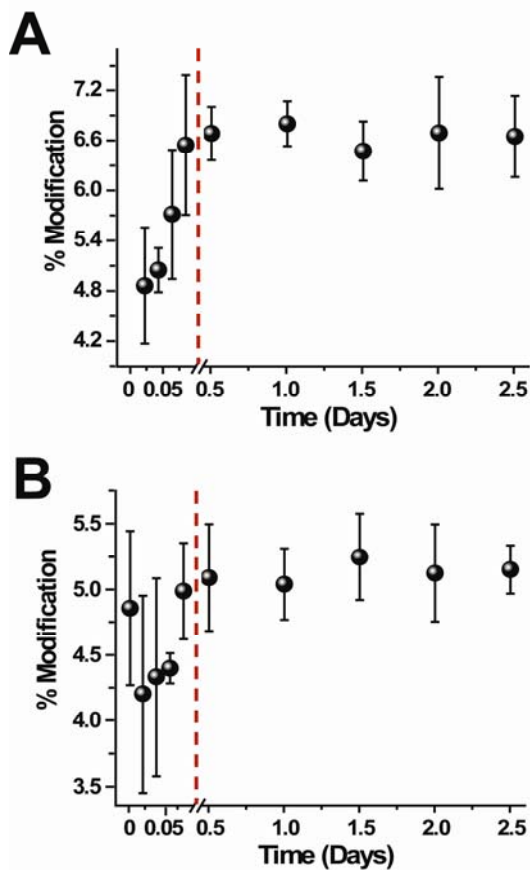

**Figure S7:** Extent of BD modification throughout the course of the tetramer formation reaction. (A) Arg45. (B) Arg97.
